# Supplementary material
Source: publisher site journal article supplement (https://www.dovepress.com/article/275316)

**Supplementary material**

**Supplementary Figure** **1:** Rarefaction curves of the Shannon index of samples collected from on-tumor site (T), off-tumor site (N), adjacent-tumor site (P), and healthy controls (Health).


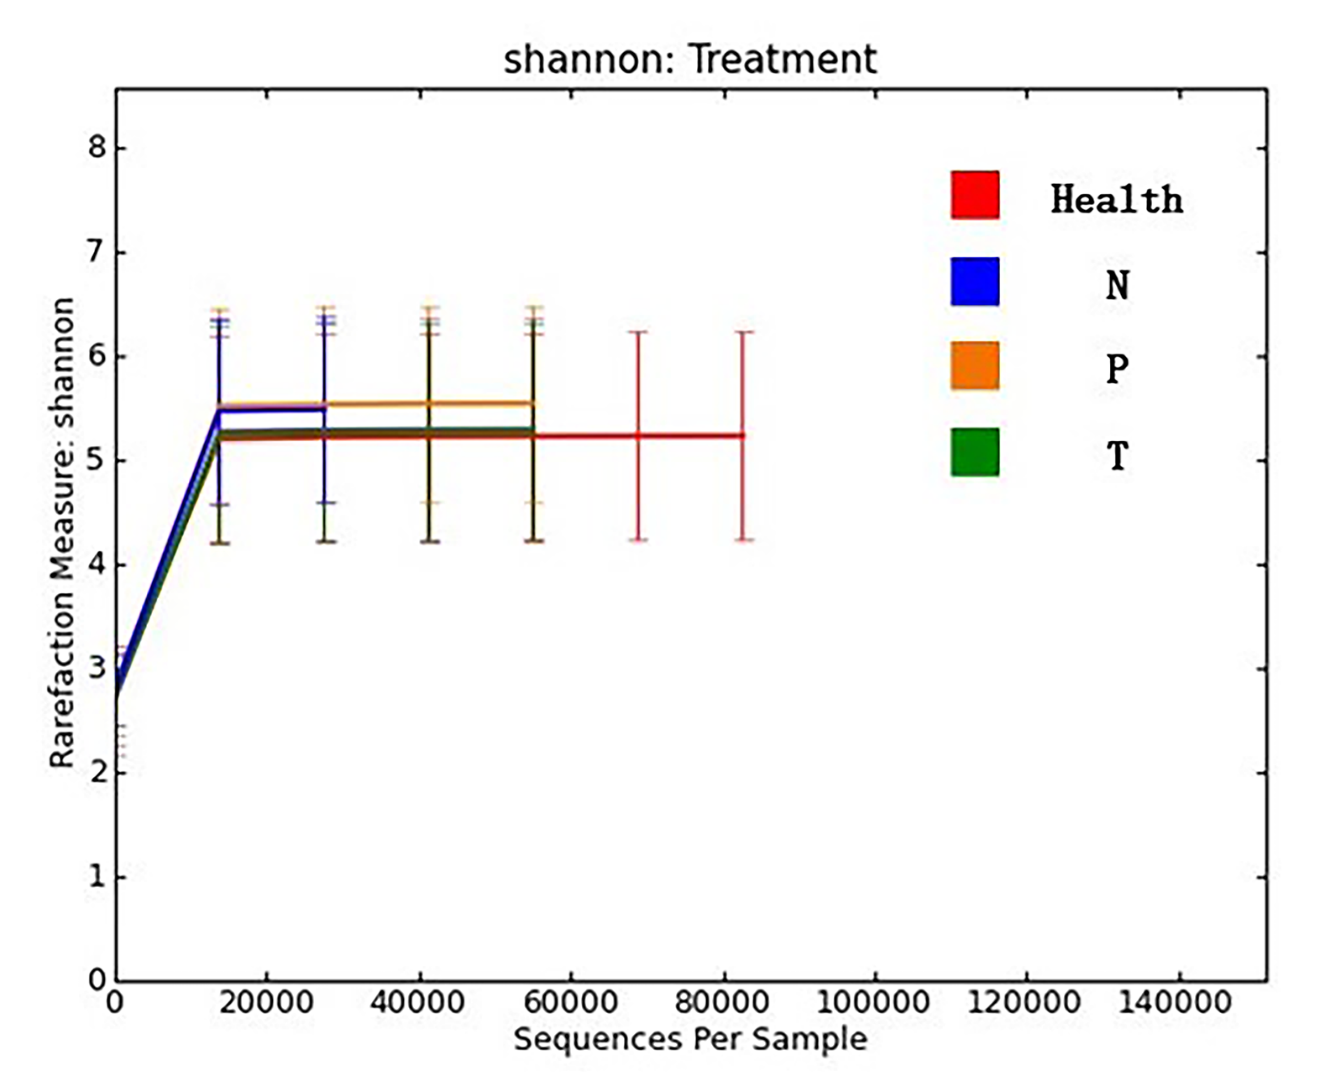

Supplement: Supplementary file 1 [file get_supplementary_file.php]
